# Supplementary material for: Evaluation of Random Forest for short-term daily streamflow forecast in rainfall and snowmelt driven watersheds
Source: Copernicus journal article supplement (doi:10.5194/hess-2020-305), 2020-06-23
Supplement: Supplementary file [file hess-2020-305-RC2-supplement.zip]

# Evaluation of Random Forest for short-term daily streamflow forecast in rainfall and snowmelt driven watersheds

Leo T. Pham<sup>1</sup>, Lifeng Luo<sup>2</sup>, and Andrew O. Finley<sup>1,2</sup>

<sup>1</sup>Department of Forestry, Michigan State University, East Lansing, Michigan, USA

<sup>2</sup>Department of Geography, Environment, and Spatial Sciences, Michigan State University, East Lansing, Michigan, USA

**Correspondence:** Leo Pham (phamleo@msu.edu)

**Abstract.** In the past decades, data-driven Machine Learning (ML) models have emerged as promising tools for short-term streamflow forecasts. Among other qualities, the popularity of ML for such applications is due to the methods' competitive performance compared with alternative approaches, ease of application, and relative lack of strict distributional assumptions. Despite the encouraging results, most applications of ML for streamflow forecast have been limited to watersheds where rainfall is the major source of runoff. In this study, we evaluate the potential of Random Forest (RF), a popular ML method, to make streamflow forecast at 1-day lead time at 86 watersheds in the Pacific Northwest. These watersheds span climatic conditions and physiographic settings and exhibit varied contributions of rainfall and snowmelt to their streamflow. Watersheds are classified into three hydrologic regimes: rainfall-dominated, transient, and snowmelt-dominated based on the timing of center of annual flow volume. RF performance is benchmarked against Naïve and multiple linear regression (MLR) models, and evaluated using four metrics Coefficient of determination, Root mean squared error, Mean absolute error, and Kling-Gupta efficiency. Model evaluation metrics suggest RF performs better in snowmelt-driven watersheds. Largest improvement in forecasts, compared to benchmark models, are found among rainfall-driven watersheds. We obtain Kling-Gupta Efficiency (KGE) scores in the range of 0.62 - 0.99. RF performance deteriorates with increase in catchment slope and increase in soil sandiness. We note disagreement between two popular measures of RF variable importance and recommend jointly considering these measures with the physical processes under study. These and other results presented provide new insights for effective application of RF-based streamflow forecasting.

## 1 Introduction

Nearly all aspects of water resource management, risk assessment, and early warning water quality and flood systems rely on accurate streamflow forecast. Yet streamflow forecasting remains a challenging task due to the dynamic nature of runoff in response to spatial and temporal variability in rainfall and catchment characteristics. Therefore, development of skillful and robust streamflow models is an active area of study in hydrology and related engineering disciplines.

In the past decades, Machine Learning (ML) models have gained popularity as promising tools to predict streamflow in addition to physical and stochastic models. These data-driven tools identify patterns in input-output relationship without explicit knowledge of the physical processes or formulation of mathematical equations. To make up for their lack of ability to provide

Anonymous: ?

Anonymous: This is very close to the definition of ML, although you do not explicitly say so.

Anonymous: This is a controversial statement. Many methods have been developed to interpret ML models and use ML to understand the underlying physical processes. Entire books have been written on the

|    |                                                                                                                                                                                                                                                                                                                                                                                                                                                                                                                                                                                                                                                                                                                                                                  |                                                                                                                                                                                                                                            |
|----|------------------------------------------------------------------------------------------------------------------------------------------------------------------------------------------------------------------------------------------------------------------------------------------------------------------------------------------------------------------------------------------------------------------------------------------------------------------------------------------------------------------------------------------------------------------------------------------------------------------------------------------------------------------------------------------------------------------------------------------------------------------|--------------------------------------------------------------------------------------------------------------------------------------------------------------------------------------------------------------------------------------------|
|    | subject<br>(https://christophm.github.io/interpretable-ml-book/).                                                                                                                                                                                                                                                                                                                                                                                                                                                                                                                                                                                                                                                                                                |                                                                                                                                                                                                                                            |
| 25 | interpretation of the underlying mechanisms, these models often require fewer data, have demonstrated high accuracy in their performance, are computationally efficient, and can be used in real-time forecast (Adamowski, 2008; Mosavi et al., 2018). ML models are particularly useful when accurate prediction is the central inferential goal (Dibike and Solomatine, 2001). Artificial neural networks (ANNs), neuro-fuzzy, support vector machine (SVM), and decision trees (DT) are reported to be among the most popular and effective for both short-term and long-term flood forecast (Mosavi et al., 2018). For example, Dawson et al.                                                                                                                | Anonymous: What are other possible goals for ML? This will not be obvious to readers unfamiliar with ML.                                                                                                                                   |
| 30 | (2006) provided flood risk estimation at ungauged sites using ANN at catchments across United Kingdom. Rasouli et al. (2012) predicted streamflow at lead times of 1-7 days with local observations and climate indices using three ML methods Bayesian neural network (BNN), SVM, and Gaussian process (GP). They found BNN outperformed multiple linear regression (MLR) as well as two other competing ML models. Their study also found models trained using climate indices yielded improved longer lead time forecasts (e.g., 5–7 days). Tongal and Booij (2018) forecasted daily streamflow in four rivers in the United                                                                                                                                  | Anonymous: Neuro-fuzzy what? This is an adjective in a list of nouns.                                                                                                                                                                      |
| 35 | States with SVR, ANNs, and Random Forest (RF) coupled with a baseflow separation method. Obringer and Nateghi (2018) compared eight parametric, semi-parametric, and non-parametric ML algorithms to forecast urban reservoir levels in Atlanta, Georgia. Their results showed RF yielded the most accurate forecasts.                                                                                                                                                                                                                                                                                                                                                                                                                                           | Anonymous: Which other models? Be specific. Your literature review should motivate the methods that you end up using.                                                                                                                      |
|    | Despite the promising results reported in existing literature, most ML streamflow forecast applications are limited to watersheds where rainfall is the major contributor. In many settings, particularly, non-arid mountainous regions, a combination of                                                                                                                                                                                                                                                                                                                                                                                                                                                                                                        | Anonymous: ? Define.                                                                                                                                                                                                                       |
| 40 | rainfall and spring snowmelt can drive streamflow (Johnstone, 2011; Knowles et al., 2007). The amount of snow accumulation and its contribution to discharge also vary among the watersheds (Knowles et al., 2006). A natural question is whether ML models can produce comparable performance in watersheds where streamflow contributions come from a mix of snowmelt and rainfall, as well as where snowmelt dominates sources. Considering the prominent role of snowpack in water management and contribution of rapid snowmelt in flood events, such question is worth exploring. To this end, we evaluate the potential                                                                                                                                   | Anonymous: Delete comma.                                                                                                                                                                                                                   |
| 45 | of RF in making short-term streamflow forecast at 1-day lead time across 86 watersheds in the Pacific Northwest Hydrologic Unit. The United States Geological Survey (USGS) defines this region as hydrologic unit code (HUC) 17 (U.S. Geological Survey, 2020). HUC-17 consists of sub-basins and watersheds of the Columbia River that span varying hydrologic regimes. The selected watersheds have long-term record of unregulated streamflow and different streamflow contributions of rainfall                                                                                                                                                                                                                                                             | Anonymous: If this the region shown in Figure 2? If yes, you should reference Figure 2 here. If no, you should include a map of the region in a different figure.                                                                          |
| 50 | and snowmelt. Other streamflow forecast studies commonly apply several ML models to a chosen watershed and evaluate the performance of the models in terms of $R^2$ or other goodness of-fit measures. Drainage basin factors such as topography, vegetation, and soil can affect the response time and mechanisms of runoff (Dingman, 2015). Few studies attempted to account for and reported these effects on models' performance. Without such consideration, it is difficult to determine if a data-driven model can be generalized to watersheds not included in the given study. Therefore, our objectives are to (1) examine and compare the performance of RF in a number of watersheds across hydrologic regimes and (2) explore the role of catchment | Anonymous: Does "unregulated" mean "not human-modified"?                                                                                                                                                                                   |
| 55 | characteristics in model performance that are overlooked in previous studies.                                                                                                                                                                                                                                                                                                                                                                                                                                                                                                                                                                                                                                                                                    | Anonymous: goodness-of-fit                                                                                                                                                                                                                 |
|    | In practice, RF can be trained to forecast streamflow at various timescales, depending on the selection of input variables. We focus on 1-day lead time because we assume only antecedent information of predictors are available at the time forecast is made. At longer lead times, changes in weather conditions would likely exert much greater control on runoff and the performance of the model.                                                                                                                                                                                                                                                                                                                                                          | Anonymous: ? I don't know what you mean by this. Random forests (and the individual trees therein) perform variable selection automatically, so random forests should not "depend on the selection of input variables".                    |
|    |                                                                                                                                                                                                                                                                                                                                                                                                                                                                                                                                                                                                                                                                                                                                                                  | Anonymous: ? I don't understand why this prevents you from forecasting at longer lead times. All forecasts are made with antecedent information, but some phenomena can still be forecast skillfully at lead times much longer than 1 day. |

2

60 We select RF to forecast streamflow for two reasons. First, RF has been referenced to deliver high performance in short-term streamflow forecasts (Mosavi et al., 2018; Papacharalampous and Tyrallis, 2018; Li et al., 2019; Shortridge et al., 2016), making it a good candidate for our study. Second, RF allows for some level of interpretability. This is delivered through two measures of predictive contribution of variables: Mean Decrease in Accuracy (MDA) and Mean Decrease in Node Impurity (MDI). These two metrics have been widely used as means for variable selection in classification and regression studies in bioinformatics (Chen and Ishwaran, 2012), remote sensing classification (Pal, 2005), and flood hazard risk assessment (Wang et al., 2015). This can be considered an advantage of RF compared with the more “black-box” nature of competing ML algorithms. While the referred interpretability does not directly translate to interpretation of the physical processes, it can provide insight into relationships among predictor variables and streamflow response.

70 The remainder of the paper is arranged as follows. Section 2 provides a brief introduction to RF and relevant parameters, and selected evaluation indices. Section 3 describes the study area, datasets, and predictor selection. Results and discussion are in Sect. 4. Acknowledgement of limitations and recommendation for future research are also discussed. A summary of conclusions is presented in Sect. 5.

## 2 Methodology

### 2.1 Random Forest

75 Proposed by Breiman (2001), RF is a semi-supervised, non-parametric algorithm within the decision tree family that comprises an ensemble of uncorrelated trees to yield prediction for classification and regression tasks. Since a single decision tree can produce high variance and is prone to noise (James et al., 2013), RF addresses this limitation by generating multiple trees where each tree is built on a bootstrapped sample of the training data. Each time a binary split is made in a tree (also known as split node), a random subset of predictors (without replacement) from the full set of predictor variables is considered. One predictor from these candidates is used to make the split where the expected sum variances of the response variable in the two resulting nodes is minimized. The randomization process in generating the subset of the features prevents one or more particularly strong predictor from getting repeatedly chosen at each split, resulting in highly correlated trees (James et al., 2013). After all the trees are grown, each tree casts a vote on a label class for classification task or a prediction value for regression task. The output is the most popular class or the average of all regression values. Breiman (2001) provided full details on Random Forest and its merit. The randomForest package in R developed by Liaw et al. (2002) was used for model training and validation 85 in our study. The step-by-step of building a regression RF follows:

Anonymous: This is true, but so what? I don't understand how this sentence fits with the rest of the paragraph.

Anonymous: This is a controversial point. Interpretation methods have been developed for many ML models. Also, many interpretation methods are model-agnostic and therefore can be applied to any ML model. In fact, one could argue that neural networks are more interpretable than random forests, since many interpretation methods rely on gradients (of the prediction with respect to model weights or input variables) and therefore cannot be applied to random forests, which are gradient-free models.

Anonymous: Random forests could also be considered a black box, since they are not readily interpretable by humans. The individual trees are interpretable on their own, but no human can read 2000 trees and understand how they are ensembled to make a prediction.

Anonymous: ?

Anonymous: Replace with comma.

Anonymous: What do you mean by this? Internal parameters (those adjusted by training), or hyperparameters?

Anonymous: Please use one term for these numbers (preferably "scores"), rather than switching back and forth between "metrics" and "indices".

Anonymous: This is false. Random forests (at least the ones you trained) are supervised learning, because the correct answer is supplied for each training example.

Anonymous: What do you mean by this? Random forests have two parameters for each split node (the predictor variable and threshold), so a forest with 2000 trees has  $O(10^4)$  parameters at least.

### Algorithm 1 Building a regression Random Forest

**Step 1:**  $n$  bootstrap samples are drawn from training set, each has the same size as the training sample. This is also known as `ntree` or number of trees in the forest.

**Step 2:** At each binary node split, a subset of `mtry` predictors,  $X_i$ , is randomly selected from  $p$  predictor space,  $\Omega_p$ , that results in  $X_i \in \Omega_p$  for  $\{i \in 1, \dots, \text{mtry}\}, \text{mtry} < p$ .

**Step 3:** The single best combination of predictor  $X$  among  $X_i$  predictor variables and threshold  $t$  is selected to split the observations,  $y_j$ , into binary regions

$R_1 = \{y_j \mid X_i < t\}$  and  $R_2 = \{y_j \mid X_i > t\}$  that minimize:

$$\sum_{j: y_j \in R_1} (y_j - \hat{y}_{R_1})^2 + \sum_{j: y_j \in R_2} (y_j - \hat{y}_{R_2})^2 \quad (1)$$

where  $\hat{y}_{R_1}$  is the mean of observations in  $R_1$  and  $\hat{y}_{R_2}$  is the mean of observations in  $R_2$ .

**Step 4:** Repeat step 2-3 until all terminal region contains less than `nodesize` observations.

Due to sampling with replacement, some observations may not be selected during the bootstrap. These are referred as out-of-bag or OOB, and used to estimate the error of the tree on unseen data. It has been estimated that approximately 37% of samples constitute OOB data (Huang and Boutros, 2016). An average OOB error is calculated for each subsequently added tree to provide an estimate of the performance gain. The OOB error can be particularly sensitive to the number of random predictors used at each split `mtry` and number of trees `ntree` (Huang and Boutros, 2016). Generally, predictive performance improves (or reduction in OOB error) as `ntree` increases. However, recent research has shown that depending on the dataset, there is a limit for number of trees where additional growing does not improve performance (Oshiro et al., 2012). It has been advised that `mtry` is set to no larger than 1/3 of total number of predictors for optimal regression prediction (Liaw et al., 2002), which is also the default value in `randomForest` function in R and widely adopted in literature. Nevertheless, Huang and Boutros (2016) found that this value is dataset-dependent and could be tuned to improve the performance of Random Forest. Bernard et al. (2009) argued the number of relevant predictors highly influences optimal `mtry` value. In this study, we select the optimal `mtry` using an exhaustive search strategy, in which all possible values of `mtry` are considered, using R package `Caret` (Kuhn et al., 2008). Figure 1 illustrates the step-by-step operating principle of growing a Random forest and its relevant parameters.

## 2.2 Variable importance in Random Forest

In addition to assessing a model's overall predictive ability, there is also interest in understanding the contribution of each predictor variable to model performance. There are two built-in metrics for assessing variable importance in RF: MDA and MDI. After all trees are grown, OOB data during training is used to compute the first measure. At each tree, the Mean squared error (MSE) between predicted and observed is calculated. Then the values of each of the  $p$  predictors are randomly permuted with other predictor variables held constant. The difference between the previous and new MSE is averaged over all trees. This is considered the predictor variable's MDA (Liaw et al., 2002) and values are reported in percent difference in MSE. The procedure is repeated for each predictor variable. Given that there is a strong association between a predictor and response

Anonymous: For readers not familiar with ML, the explanation of random forests could benefit from two simple figures (schematics): one showing how individual trees work and one showing how forests work.

Anonymous: Now I see that you have a figure explaining random forests (Figure 1). This should be referenced at the beginning of the explanation. Otherwise, it does not support the explanation, and readers unfamiliar with ML will likely be lost.

Anonymous: This is false. The trees are always somewhat correlated, because there is overlap among training sets for the different trees (since training sets are resampled \*with replacement\* from the full training set).

Anonymous: Explain example-bagging (bootstrapping) and predictor-bagging more clearly.

Anonymous: Please explain this more clearly.

Anonymous: How does this happen? How does each tree make a prediction for a new example? Please clarify.

Anonymous: This algorithm will probably not be intuitive for readers unfamiliar with ML. I think a plain-language explanation, along with a figure, would be much better.

Anonymous: This is not an estimate. It is called the "0.632" rule and has been mathematically proven: <https://www.jstor.org/stable/2965703?seq=1>

Anonymous: ? Please explain more clearly.

Anonymous: Replace with "or OOB error decreases".

Anonymous: Unnecessary detail, since the hyperparameter experiment you described could be implemented with a simple for-loop (does not require a special library).



variable, breaking such bond would result in large error in the prediction (ie., large MDA). It is noted MDA value can be negative where a predictor has no predictive power and adds noise to the model.

The second method, MDI, measures the average gain in residual error reduction each time a predictor is selected to make a split during training. It is based on the principle that a binary split only occurs when residual errors (or impurity) of two descendent nodes are less than that of their parent node. The MDI of a predictor is the sum of all gains across all trees divided by the number of trees. Because the scale of MDI depends on values of response variable, raw MDI provides little interpretation. Following Wang et al. (2015), we computed relative MDI for each variable, which in our case is calculated by dividing each predictor variable's MDI by the sum of MDI from all predictors at each watershed. When scaled by 100, this relative MDI is a percentage and can be interpreted as the relative contribution of each predictor to the total reduction in node impurities. In case the predictor makes no contribution during the splitting, the relative MDI would be effectively zero. In both metrics, the larger the value, the more important the predictor.

### 2.3 Benchmark models

We benchmark the performance of RF during the validation period against multiple linear regression (MLR) and simple Naïve models using the calculated Pearson correlation coefficient ( $r$ ) between forecasted and observed values for each model. In Naïve model, we assume "minimal-information" scenario and the best estimate of the streamflow from the next day is the observed value from current day (Gupta et al., 1999). Its  $r$ , in this case, is the 1-day autocorrelation coefficient in the time series and measures of the strength of persistence. We train and verify MLR model using same data sets and predictors supplied to RF model.

### 2.4 Evaluation metrics

There exists different model performance metrics and each provides unique insights on the correspondence between forecasted and observed streamflow values. While Pearson correlation coefficient ( $r$ ) and its square, namely Coefficient of determination ( $R^2$ ), are often used, Legates and McCabe Jr (1999) discussed the limitation of these two measures. The authors recommended that absolute error measures (i.e., Root mean squared error or Mean absolute error) and goodness-of-fit measure, such as the Nash-Sutcliffe efficiency (NSE), could provide more reliable and conservative assessment of the models. Kling-Gupta efficiency (KGE) is a relatively new metric that was developed based on a decomposition of NSE (Gupta et al., 2009). This goodness-of-fit measure is gaining popularity as a benchmark metric for hydrologic models by addressing several shortcomings diagnosed with NSE. For these reasons, we selected the following four metrics to evaluate RF performance:  $R^2$ , RMSE, MAE, and KGE. These metrics cover various aspects of model's performance and are also provide intuitive interpretation.

Anonymous: So you compute a different MSE for each tree, rather than computing one MSE for the whole random forest?

Anonymous: Is this method any different than the permutation test created by Breiman (2001)?

Anonymous: Not necessarily. If there are two highly correlated predictor variables ( $x_1$  and  $x_2$ ), permuting one of the two may not decrease the model's performance. For example, if you permute only  $x_1$ , even if  $x_1$  is highly important, the model may still perform well by relying on  $x_2$ , since  $x_1$  and  $x_2$  contain a lot of redundant information.

Anonymous: ?

Anonymous: ? I generally don't know what you mean in this sentence.

Anonymous: This shouldn't matter if you have only one response variable, right? It should matter only if you have multiple response variables with different scales (e.g., one response variable that ranges from 0...1 and another that ranges from 500...5000).

Anonymous: I suggest calling this the "persistence baseline," rather than the naïve model. The word "naïve" evokes naïve Bayes for many people.

Anonymous: What are these limitations? Please discuss. Model evaluation is very important, and the methods you use should be explicitly justified.

Anonymous: How?

$R^2$  can be interpreted as the proportion of the variance in the observed values that can be explained by the model. Values are in the range between 0 and 1 where 1 indicates the model is able to explain all variation in the observed dataset.

$$R^2 = \left( \frac{\sum_{i=1}^N (\hat{y}_i - \bar{\hat{y}})(y_i - \bar{y})}{\sqrt{\sum_{i=1}^N (\hat{y}_i - \bar{\hat{y}})^2} \sqrt{\sum_{i=1}^N (y_i - \bar{y})^2}} \right)^2 \quad (2)$$

Anonymous: Please define all variables in this equation, including the N and i.

140 where  $\hat{y}_i$  and  $y_i$  are the forecasted and observed values respectively with

$$\bar{y}_i = \frac{1}{N} \sum_{i=1}^N y_i \quad \text{and} \quad \bar{\hat{y}}_i = \frac{1}{N} \sum_{i=1}^N \hat{y}_i \quad (3)$$

MAE provides an average magnitude of the errors in the model's predictions without considering the direction (underestimation or overestimation).

$$MAE = \frac{\sum_{i=1}^N |\hat{y}_i - y_i|}{N} \quad (4)$$

145 RMSE is the standard deviation of the residuals between the predictions and observers. It is more sensitive to larger error due to the squared operation. Both MAE and RMSE values are scale-dependent as they depend on the magnitude of values. The standardization in streamflow measurements (described in Sect. 3) allows comparison of MAE and RMSE across gauges.

Anonymous: observations

Anonymous: What do you mean by this? More sensitive to outliers?

$$RMSE = \sqrt{\frac{\sum_{i=1}^N (\hat{y}_i - y_i)^2}{N}} \quad (5)$$

Anonymous: Please state the ranges and optimal values for MAE and RMSE, like you did for  $R^2$ . (I know that it's probably obvious to most readers, but it's a small amount of additional text and worth specifying.)

150 KGE metric ranges between -inf and 1. While there currently is not a definitive KGE scale, negative KGE values are considered "not satisfactory" or "undesirable" (Schönfelder et al., 2017; Siqueira et al., 2018) and model performance is considered as "poor" with  $0 < KGE < 0.5$  (Rogelis et al., 2016). KGE is calculated as follows:

$$KGE = 1 - \sqrt{(r - 1)^2 + (\alpha - 1)^2 + (\beta - 1)^2} \quad (6)$$

where  $r$  is the correlation coefficient,  $\alpha$  is a measure of relative variability in the forecasted and observed values, and  $\beta$  represents the bias:

$$155 \quad \alpha = \frac{\sigma_{\hat{y}}}{\sigma_y} \quad \text{and} \quad \beta = \frac{\mu_{\hat{y}}}{\mu_y} \quad (7)$$

Anonymous: Please use the real mathematical symbol here.

where  $\sigma_{\hat{y}}$  is the standard deviation in observations,  $\sigma_y$  is the standard deviation in forecasted values,  $\mu_{\hat{y}}$  is the forecasted mean, and  $\mu_y$  is observation mean.

In hydrological forecast, one might be interested in the ability of the model to capture more extreme events rather than the overall performance. The definition of “extreme” depends on the objective of the studies. Here, we adopt the peak-over-threshold method of **classifying points extreme daily discharge** at 90<sup>th</sup>, 95<sup>th</sup>, and 99<sup>th</sup> percentile thresholds during the validation period. We measure the ability of RF to capture these events using two additional metrics: Probability of Detection (POD) and False Alarm Rate (FAR). The calculation followed as in (Karran et al., 2013).

$$POD = \frac{P(\hat{y}_i > \omega | y_i > \omega)}{P(y_i > \omega)} \quad (8)$$

$$FAR = \frac{P(\hat{y}_i > \omega | y_i < \omega)}{P(y_i < \omega)} \quad (9)$$

where  $\omega$  is a specified threshold.

### 3 Study Area and data

#### 3.1 Watersheds in Pacific Northwest Hydrological Unit

In this study, we focus on watersheds in the Pacific Northwest or USGS designated HUC 17. This region covers an area of 836,517 km<sup>2</sup> and encompasses all of Washington, six other states, and British Columbia, Canada. For the purpose of maintaining consistency in monitoring protocol and data, we only consider watersheds on the US territory. Columbia River and its tributaries make up the majority of the drainage area, traveling more than 1,240 miles with an extensive network of more than 100 hydroelectric dams and reservoirs have been built along these river channels. Hydropower in the Columbia River Basin supplies approximately 70 percent of Pacific Northwest energy (Payne et al., 2004). Flood control is also an important aspect of reservoir operation in this region.

**The north-south running Cascade Mountain Range divides the region into eastern and western parts and strongly influence the regional climate.** The **windward** side of the mountain receives an ample amount of winter precipitation compared to the leeward side. When temperature falls near freezing point, precipitation comes in the form of snow and provides water storage for dry summer months. **East of the Cascades**, summer rainfall result from rapidly built **thunderstorm and convective events** that can produce flash floods (Mass, 2015). **Proximity to the ocean provides buffering effect**, resulting in more mild temperature in the winter.

Anonymous: ? I don't know what this means.

Anonymous: Figure 2 should be referenced much earlier (at the beginning of this section and also in the introduction, where you first mention the HUC 17 region). It is difficult to understand all this description without a map.

Anonymous: Please specify that the windward side is the west side, while the leeward side is the east side, on average.

Anonymous: What happens west of the Cascades during summer?

Anonymous: This is redundant. Replace with "thunderstorms".

Anonymous: A buffering effect to what? What does the ocean "buffer"?

### 3.2 Data

#### 3.2.1 Streamflow

Our analysis uses streamflow data available through the USGS National Water Information System (NWIS) (<https://waterdata.usgs.gov/nwis/sw>). From NWIS, we selected daily streamflow time series for gauges using the following criteria: 1) continuous operation during the 10-year period between 2009 and 2018; 2) have less than 10 percent of missing data; 3) positioned in watersheds with “natural” flow that is minimally interrupted by anthropogenic intervention such as reservoirs. The third criterion was met using the GAGES-II: Geospatial Attributes of gauges for Evaluating Streamflow dataset (Falcone, 2011) classification to identify watersheds with least-disturbed hydrologic condition and represented natural flow. **Additional screening was performed to remove gauges that were inconsistent with others based on correlation coefficient comparison between the respective gauge and mean basin streamflow.** We also excluded small creeks with drainage area less than 50 km<sup>2</sup>. In total, 86 watersheds were selected (complete watershed physical characteristics are provided in Supplementary materials).

Following methodology proposed in Wenger et al. (2010), the watersheds were further grouped into three classes of hydrologic regimes based on the timing of center of annual flow, which is defined as the date at which half of the total annual flow volume is exceeded. The annual flow calculations follow a water-year calendar that begins October 1<sup>st</sup> and ends September 30<sup>th</sup>. These three hydrologic regimes include: “early” streams with flow time < 150 (27 February), “late” streams with flow time > 200 (18 April), and “intermediate” streams with flow time between 150 and 200. These hydrologic regimes correspond to rainfall-dominated, snowmelt-dominated, and transient or transitional (mixture of rain and snowmelt) hydrographs, respectively. While this particular classification and its variants have been used in various studies related to water resources in this region (Mantua et al., 2009; Elsner et al., 2010; Vano et al., 2015), we adopted this partition in our study for two reasons. First, as Regonda et al. (2005) pointed out, the classification provides a summary of information about type and timing of precipitation, timing of snowmelt, and the contribution of these hydro-climatic variables to streamflow. This helps us assess model performance in consideration of sources of runoff. Second, the classification provides a basis to generalize the results to other watersheds that are not part of the study.

On average, records at these watersheds have less than 3 percent missing data during the 2009–2018 period. The drainage area of the watersheds range between 51 km<sup>2</sup> and 3355 km<sup>2</sup>, and the mean elevation range from 239 m and 2509 m, estimated from 30-m resolution digital elevation model (Table 1). **Spatial distribution of watersheds is shown in Fig. 2.**

#### 3.2.2 Precipitation

Daily precipitation observations were obtained from the AN81d PRISM dataset (Di Luzio et al., 2008). This gridded dataset has a resolution of 4km, covers the entire continental US from January 1981 to present, and is continuously updated every 6 months. Best estimate gridded value is derived by using all the available data from numbers of station networks ingested by the PRISM Climate Group. A combination of Climatologically aided interpolation (CAI) and **RADAR** interpolation were used in developing PRISM dataset. In our study, watershed daily precipitation **(measured in mm)** time series were constructed by computing the arithmetic mean for precipitation values of all grid points that fall within the given watershed.

Anonymous: ? Please explain this.

Anonymous: As I mentioned, this figure should be referenced much earlier (in the intro, where you first mention HUC 17, and at the beginning of Section 3.1).

Anonymous: This term is never capitalized in meteorology.

Anonymous: Unnecessary detail.



Snow water equivalent (SWE) is defined as the depth of water that would be obtained if a column of snow were completely melted (Pan et al., 2003). Daily SWE data were retrieved from 201 Snow Telemetry (SNOTEL) Stations in the PNW. These stations are part of the network of over 800 sites located in remote, high-elevation mountain watersheds in the western U.S. The elevation of these stations are in the range of 128 m and 3142 m. At SNOTEL sites, SWE is measured by a snow pillow—a pressure sensitive pad that weighs the snowpack and records the reading via a pressure transducer. As the temperature shift is the primary trigger for snowmelt, daily maximum temperature (TMAX) and minimum temperature (TMIN) from SNOTEL sensors were also retrieved and included as predictors. The obtained data reflected the last measurement recorded for the respective day at each site. The dataset is mostly complete, with 99.6%/99.6%/99.9% of the observations are available for three variables TMAX, TMIN, and SWE respectively. Because of the sparse coverage of SNOTEL sites, daily average values were calculated at USGS basin level (or 6-digit Hydrological Unit) and subsequently applied to the watersheds located in that basin. There is a total of 15 basins, each contains a number of SNOTEL stations in the range between 6 and 30. It is noted the in situ data from these of stations cannot capture the spatial variability of snow accumulation and computing an area-averaged snowpack value from observations remains a challenging task (Mote et al., 2018). The SNOTEL averages, therefore, represent first-order estimates of snow coverage and temperature conditions.

230 3.2.4 Predictor selection

Future daily mean streamflow ( $Q_{t+1}$ ) is the response variable in our study. We attempt to explain the variability in  $Q_{t+1}$  using eight relevant predictors from the three datasets (Table 2). Selection of predictors is based on thorough review of the literature from previous studies and our understanding of the hydrology of this region. Specifically, precipitation ( $P_t$ ) is intuitively a driver of streamflow.  $SWE_t$  metric provides storage information on the amount of accumulated snow available for runoff and is influenced by changes in temperature ( $TMAX_t$  and  $TMIN_t$ ). Previous day streamflow ( $Q_t$ ) is particularly important due to high degree of persistence that exist in the time series. The Pentad Index ( $PEN_t$ ) is introduced to account for highly seasonal characteristics of the streamflow in this region (Zheng et al., 2018). A hydrological year consists of 73 pentads where each comprises of five consecutive days. Data preprocessing showed moderate to strong non-linear correlation between daily streamflow and Pentad Index across gauges. We also derived two variables: sum of 3-day precipitation ( $P3_t$ ) and snowmelt ( $SD_t$ ) from available data. Inclusion of 3-day precipitation was to account for large winter storms that can last for several days, which often result in surges in streamflow.  $SD_t$  was calculated as the difference between SWE at day  $t$  and  $t - 1$ . It is noted that we use the term “snowmelt” to facilitate discussion in the context of runoff generated mechanism. A positive value of  $SD_t$  indicates snow accumulation and negative value indicates melt.

Soil moisture is also a relevant variable in streamflow modeling as it controls the partition between infiltration and runoff of precipitation (Aubert et al., 2003). However, soil moisture data is often limited and incomplete, especially at daily interval and therefore not included in this study. The data were divided into two sets: training consisting of seven years 2009–2015 and

Anonymous: Predictors of what? Streamflow, or SWE?

Anonymous: Why only the last measurement of each day?

Anonymous: How big are these basins? Please show a map.

Anonymous: Can you discuss how much this affects the accuracy of your model? It seems like a major caveat.

Anonymous: Why not use all predictors available? Random forests are not computationally expensive and perform predictor selection automatically.

Anonymous: Why use T\_min and T\_max as predictors if their only influence is on SWE (another predictor)? In that case you should just use SWE.

Anonymous: This only tells me what a pentad is, not what the "pentad index" is. Please define the "pentad index".

Anonymous: What do you mean by "across gauges"? Is this correlation a spatial correlation, or is it computed at each gauge (in which case it's temporal but not spatial)?

Anonymous: I don't understand what this sentence is doing here. It seems like a non-sequitur.

a validation set of three years 2016–2018. All data was standardized using Min-Max Scaling to facilitate comparison across gauges. A flowchart representing the input-output model based on RF is shown in Fig. 3.

## 4 Results and discussion

### 4.1 Parameter tuning

As we mentioned in Sect. 2, error rate in RF can be sensitive to two parameters: the number of trees  $n_{tree}$  and number of randomly selected predictors available for splitting at each node  $m_{try}$ . We trained RF on a sample of training data sets and observed that the reduction in error is negligible after 2000 trees. Therefore,  $n_{tree}=2000$  was set across watersheds.  $m_{try}$ , on the other hand, was tuned empirically using a combination of exhaustive search approach and cross-validation.

The goal of tuning is to select the  $m_{try}$  parameter value that would optimize the performance of the model. The candidates were evaluated based on their out-of-bag Mean absolute error (MAE). At each watershed, eight possible candidate values of  $m_{try}$  (1-8) were analyzed by 3 repetitions of 10-fold cross validation from the train data set. Averaging the MAE of repetitions of the cross-validation procedure can provide more reliable results as the variance of the estimation is reduced (Seibold et al., 2018). To illustrate, in Fig. 4, lowest cross-validation MAE is obtained at  $m_{try} = 3$  at Carbon River Watershed (USGS Site 12094000). The results of tuning for all gauges (Table 3) show that the optimal  $m_{try}$  values are {3,4,5} with median MAE of 0.0127, 0.0116, and 0.0079 respectively. These values are close to the suggested default  $m_{try}$  for regression (i.e., round-up of the square root of total number of predictors or 3 in our study). The optimal  $m_{try}$  at each gauge was then used in both training and validating the model. Because the number of predictors in our study is relatively small, computation burden of the exhaustive search was manageable. As the number of candidate grows, a random search strategy (Probst et al., 2019) in which values are drawn randomly from a specified space can be more computationally efficient.

### 4.2 Benchmark RF against Multiple Linear Regression and Naïve models

Figure 5 shows the pair-wise comparisons of  $r$  values for RF, MLR, and Naïve models. In Fig. 5a, we observe RF mostly outperforms Naïve Model in rainfall-driven and transient watersheds. We also discern large improvement, defined as the positive difference in  $r$  values between RF and Naïve Model, tends to occur where persistence is relatively lower. This suggests that application of RF would be most benefiting at watersheds where next-day streamflow is less dependent on the condition of the current day. Among snowmelt-driven watersheds, three models show marginal difference in  $r$  values. As Mittermaier (2008) pointed out, the choice of reference can affect the perceived performance of the forecast system. Our pair-wise comparisons highlight the fact that evaluating data-driven models should be performed in consideration of the autocorrelation structure in the data (Hwang et al., 2012). Without accounting for persistence model, it would inadequate to conclude that RF gives better performance in snowmelt-driven watersheds. Nevertheless, we observe RF outperformed MLR in all watersheds in rainfall-dominated and transitional watersheds and 19 out of 25 snowmelt-dominated watersheds. The median  $r$  values for RF in the

Anonymous: How? There are many ways to do min-max scaling. For example, what are the min and max values after standardization? Also, which dataset do you use to compute the min and max values for scaling? Just the training set, or both training and validation?

Anonymous: Random forests have many other hyperparameters: minimum sample size per split node, minimum sample size per leaf node, maximum depth, cost function, etc.).

Anonymous: What is a "sample of training data sets"? I thought you had only one training set (2009-15).

Anonymous: What do you mean by "error"? Which evaluation score and on which dataset (out-of-bag training data, validation data, or something else)?

Anonymous: Why optimize for MAE, instead of one of the other scores you looked at (RMSE,  $R^2$ , or KGE)?

Anonymous: ? On line 95 you said that the default is  $M/3$ , where  $M$  = number of predictors.

Anonymous: Is this shown in the figures?

Anonymous: ? I don't understand this sentence.

Anonymous: How many of these differences are statistically significant? In general, all comparisons between two models should be accompanied by a significance test.

three groups are (0.88, 0.89, 0.98) compared to (0.85, 0.87, 0.98) for MLR. This may reflect RF's better ability to capture non-linear relationship between streamflow and other variables.

Anonymous: Usually such small differences are not statistically significant.

### 4.3 Evaluation of RF overall performance

280 We next evaluated the overall performance of RF across three flow regimes using four metrics  $R^2$ , KGE, MAE, and RMSE (Fig. 6). We observe similar trend reported in Fig. 5 where RF performs better in snowmelt-dominated than rainfall-dominated (higher  $R^2$ , lower MAE). Snowmelt-dominated watersheds have the smallest range of  $R^2$  values across the three groups. This may suggest that there is less variability in flow behaviors at individual gauges in this group. Not surprisingly, transitional group has the largest spread in  $R^2$  values as watersheds in this group share characteristics from the other two groups.

Anonymous: Could you verify this hypothesis by analyzing the data?

285 Because RMSE gives more weight to larger errors compared to MAE, the difference between the two metrics represents the extent in which outliers are present in error values (Legates and McCabe Jr, 1999). In rainfall-driven and transient groups, the shape of the boxplot distributions remain fairly consistent between the two error metrics, suggesting that distribution of large errors is similar to that of mean errors in these watersheds. In snowmelt-driven watersheds, we observe a noticeably wider interquartile range (difference between first quartile and third quartile) in RMSE plot compared to MAE plot. This indicates that RF can still be susceptible to underestimation or overestimation in watersheds where the mean error is relatively low.

Anonymous: How can large errors and mean errors have the same distribution? By definition, large errors are greater than mean errors.

290 In Table 4, KGE scores are reported in a range of 0.64–0.99 for all watersheds. The median values for each flow regime are 0.84, 0.87, and 0.94. Based on assessment proposed by Rogelis et al. (2016) where model performance is considered “poor” for  $0.5 > \text{KGE} > 0$ , RF can be seen to give satisfactory performance at all watersheds. Our results are comparable to findings in Tongal and Booij (2018) where authors compare the performance of RF, SVM, and ANNs to simulate daily discharge with baseflow separation at four rivers in California and Washington. Although authors did not classified these basins, it can be inferred three of the rivers were rainfall-driven and one was snowmelt-driven. RF model in their study produced KGE scores of 0.41, 0.81, and 0.92 for the rainfall-driven water basins (without baseflow separation). However, our KGE scores for snowmelt-fed watersheds (with a median of 0.94) are higher compared to the reported 0.55 in their study.

Anonymous: The opposite of "poor" is not "satisfactory". Does the Rogelis paper define other ranges of KGE as "fair," "good," "excellent," etc.? Or does it just say that the 0-0.5 range is "poor"?

Anonymous: ? Define.

Anonymous: Is this a fair comparison? The sets of watersheds is your paper vs. Tongal and Booij are completely different, no?

### 4.4 RF performance on extreme streamflows

300 We also examine the model's capacity to forecast extreme events because of their potential high impact and associated flood risks in this region. As seen in Fig. 7a, RF becomes expectedly less skilful in its forecasts with increase in magnitude of the events. At 90th percentile threshold, we observe the same pattern as seen in the  $R^2$  and KGE boxplots. The model tends to perform better among snowmelt-dominated watersheds compared to those in transient and rainfall-driven groups. At 95th threshold, RF can forecast correctly at least 50 percent of the times at most watersheds. At 99th threshold, there are large spreads in POD and the difference in RF's ability to forecast extreme streamflow among the three flow regimes becomes less obvious. In snowmelt-driven watersheds, 8 out of 25 have  $\text{POD} > 0.5$ , 9 have POD between 0.01 and 0.5, and 8 have a POD of 0. While few studies have examined complex diel hydrologic responses in high-elevation catchments (Graham et al., 2013), our particular result suggests large surges in streamflow sustained by spring and early summer snowmelt can be difficult to predict, even at 1-day lead time, and is an ongoing research subject (Ralph et al., 2014). We see in Fig. 7b, False alarm rate

Anonymous: Figure 7 should be plotted on a performance diagram. This would allow you to show POD, FAR, frequency bias, and CSI all in the same figure. For example, see Figure 12 in this paper: <https://journals.ametsoc.org/waf/article/35/4/1523/34759>

Anonymous: What is the actual value corresponding to each percentile?

Anonymous: You cannot make this conclusion from Figure 7. "Forecasting correctly 50% of the time" means that accuracy is 50%, but Figure 7 does not show accuracy. Also, an accuracy of 50% is extremely

310 (FAR) is in agreement with POD and suggests that RF is consistent in its forecasts of rare events. That is, a high POD value is not a result of systematic overestimation. In such cases, we would observe both high POD and FAR among snowmelt-driven watersheds.

4.5 Analysis of variable importance

Variable importance is a useful feature in both understanding the underlying process of current model and generating insights for selection of variable in future studies (Louppe et al., 2013). RF quantifies variable importance through two metrics: DMA and MDI (Fig. 8). In both metrics, the higher value indicates variable contributes more to the model accuracy. Intuitively, streamflow from previous day is shown to be the most importance variable due to persistence. This is reflected across three flow regimes and two metrics. We also observe the sum of 3-day precipitation tends to more predictive power than than 1-day precipitation. Maximum temperature and minimum temperature share similar contribution where minimum temperatures tend to receive slightly higher scores. Among snowmelt-dominated watersheds (Fig. 8c and 8f), we anticipate snow indices ( $SD_t$  and  $SWE_t$ ) contribute more in the prediction than precipitation and this is also reflected. Surprisingly, Pentad Index comes third in both metrics. This supports the long-term snowpack memory of daily streamflow (Zheng et al., 2018) and can be useful in real prediction. Precipitation does not seem to have significant contribution to the model’s accuracy in this group. Although PRISM precipitation data includes both rainfall and snowfall, it is likely that the majority of fallen precipitation in these high-altitude watersheds is stored as snow on the surface and does not immediately contribute to runoff. Li et al. (2017) estimated that 37% of the precipitation falls as snow in western US, yet snowmelt is responsible for 70% of the total runoff in mountainous areas. It is still very surprising to observe such low contribution of precipitation variable to RF model accuracy. Nevertheless, we observe general agreement between the two metrics in ranking of the variables in snowmelt-driven group.

In transient and rainfall-dominated groups, there are noticeable disagreement between the two metrics. Precipitation ( $P_t$ ) and 3-day precipitation ( $P3_t$ ) tend to rank lower in MDA measure (Fig. 8a and 8b) compared to MDI (Fig. 8d and 8e). Specifically, in rainfall-dominated group, 3-day precipitation and precipitation are placed 2<sup>nd</sup> and 3<sup>rd</sup> based on median MDI compared to 4<sup>th</sup> and 7<sup>th</sup> in MDA. Maximum and minimum temperatures, on the other hand, tend to be more important in MDA calculation compared to in MDI. In Shortridge et al. (2016), RF model was used to predict streamflow at five rain-fed rivers in Ethiopia. Similarly calculated MDA in this study suggested precipitation were less important (7.71%) than temperature (12.74%). Linear model in the same study, however, considered the coefficient for precipitation to be significant ( $p < 0.01$ ) while temperature coefficient was not ( $p = 0.08$ ). In Obringer and Nateghi (2018), authors predicted daily reservoir levels in three reservoirs in Indiana, Texas, and Atlanta using RF and other ML techniques. Precipitation was reported as the least important variable and ranked behind dew point temperature and humidity. Inspecting the density distribution of our predictors, we suspect that for variables that are heavily skewed and zero-inflated (e.g., precipitation), permutation-based MDA may underestimate their importance compared to those that are more normally distributed such as maximum and minimum temperatures. Strobl et al. (2007) showed RF variable importance measures can be unreliable in situations where potential predictor variables vary in their scale of measurement or their number of categories. There is also an ongoing discussion regarding the stability of both

|                                                                                                                                                                                                    |
|----------------------------------------------------------------------------------------------------------------------------------------------------------------------------------------------------|
| low for a binary event.                                                                                                                                                                            |
| Anonymous: ?                                                                                                                                                                                       |
| Anonymous: This hypothesis seems like just a guess. Can you verify it by looking at the data (i.e., explicitly looking at predictions for cases with large surges vs. cases without large surges)? |
| Anonymous: What does this mean? FAR and POD measure very different things, so what does it mean for them to be "in agreement"?                                                                     |
| Anonymous: You don't know this until you have calculated frequency bias (which is shown in performance diagrams).                                                                                  |
|                                                                                                                                                                                                    |

metrics across different datasets (Nicodemus, 2011; Calle and Urrea, 2010). Although results from MDI make more sense in our case, we suggest RF users to exert caution when interpreting outputs from these two metrics.

#### 345 4.6 Effects of watershed characteristics on model performance

To explore the role of catchment characteristics such as geology, topography, and land cover on the performance of RF model, we perform Pearson correlation test between the KGE scores and selected basin physical characteristics for each flow regime. The results are shown in Table 5. There is a strong negative correlation ( $p < 0.05$ ) between KGE scores and watershed slopes among rainfall-dominated and transient watersheds. As steeper hillslope often associates with faster surface and subsurface  
350 water movement during event-flow runoff, this can result in shorter response time. We observe a similar trend between KGE scores and percent of sand in the soil (Fig. 9) where the RF performs worse in watersheds with higher hydraulic conductivities (i.e., higher sand content). This could be a result of rapid subsurface flow from soil profile enabled by soil macropores in mountainous forested area (Srivastava et al., 2017), where subsurface flow is the predominant mechanism. Without a quantification of the partition of discharge into surface flow and subsurface flow at individual watersheds, it is difficult to determine  
355 the relative importance of subsurface runoff mechanisms in regulating streamflow and how that may have affected the RF performance. The findings, however, suggest RF performance can deteriorate at watersheds with quick-response runoff when supplied with 1-day delayed observation data.

It appears that stream density and the amount of vegetation cover may also affect the performance of RF, but the relationships are not statistically significant at  $\alpha = 0.05$ . Aspect eastness, drainage area, and basin compactness are not determining factors  
360 to variability in the KGE scores. We also explored the impact of land-use/land-cover, which can be represented by the extent of impervious cover in each watershed. However, because we only selected unregulated watersheds that experienced minimal human disruption during the initial screening, most watersheds have very little impervious cover (less than 5%). It is noted that these selected characteristics are not meant to be exhaustive, but rather representative of various types of factors that could help explain the variability in model performance. Furthermore, an alternative approach to Pearson's correlation is to use ANOVA to  
365 test for marginal significance of each catchment variable to KGE while accounting for their interaction. Because our objective is not to make inference on KGE based on these variables and ANOVA analysis can be complicated to interpret, we choose to compute correlation coefficient  $r$ .

#### 4.7 Limitations and future research

There are some notable limitations in our study as well as RF in general. The classification of watersheds into three flow  
370 regimes was based on the timing of the climatological mean of the annual flow volume, which can fluctuate from year to year. This is particularly true for watersheds in transient group where streamflow is contributed by a mix of runoff from winter rainfall and springtime snowmelt, where inter-annual variability is tremendous in both magnitude and timing (Lundquist et al., 2009). Therefore, the membership of the classified watersheds from this group can vary. In fact, Mantua et al. (2009) discussed the future shift of transient runoff watersheds towards rainfall-dominated in Washington. Because we trained RF using the same



375 input variables for all watersheds regardless of flow regimes and calculated performance metrics separately, the classification does not alter the results at individual watershed.

In the study, we used estimated precipitation from PRISM, which is an interpolation product and combines data from various rain gauges from multiple networks. Despite of possible introduced errors and uncertainty, we believe the use of spatially distributed product better represents the areal estimation of precipitation over the basin than a single rain gauge measurement. 380 In real-time forecast, this would be not be feasible due to the added time to compile and process such data. As our results indicate that RF can produce reasonable forecasts, potential future research could explore the sensitivity of the model using a station data or even include  $t + 1$  precipitation forecast as a predictor.

An inherent limitation of RF is the lack of direct uncertainty quantification in prediction. In our case, forecasted streamflow using RF does not yield a standard error comparable to that provided traditional linear model, and hence no way to provide 385 probabalistic confidence intervals on predictions. Estimation confidence interval methods have been proposed by Wager et al. (2014); Mentch and Hooker (2016); Coulston et al. (2016), but they are not widely applied. For future work, computation of confidence interval in RF prediction will be useful in addressing and understanding uncertainty.

## 5 Conclusions

Accurate streamflow forecast has extensive applications across disciplines from water resources and planning to engineering 390 design. In this study, we assessed the ability of RF to make daily streamflow forecast at 86 watersheds in the Pacific Northwest. Key results are summarized below:

- Based on KGE scores (ranging from 0.62 to 0.99), we show RF is able to produce useful forecasts across all watersheds.
- RF performs better in snowmelt-dominated watersheds, which can be attributed to stronger persistence in the streamflow time series. Largest improvements in forecast compared to Naïve model are found among rainfall-dominated watersheds.
- 395 – The two built-in approaches for measuring predictor importance yield noticeably different results. We recommend interpretation of the these two metrics should be coupled with understanding of the physical processes and how these processes are connected.
- Steepness of slope and amount of sand content are found to deteriorate RF performance in two flow regime groups. This demonstrates catchment characteristics can cause variability in performance of the model and should be considered in 400 both predictor selection and evaluation of the model.

Considering the current and future vulnerabilities of the Pacific Northwest to flooding caused by extreme precipitation and significant snowmelt events (Ralph et al., 2014), skillful streamflow forecasts can have important implications. Due to its practical applications, RF and RF-based algorithms continue to gain popularity in hydrological studies (Tyralis et al., 2019). Given the promising results from our study, RF can be used as part of an ensemble of models to achieve better generalization 405 ability and accuracy not only in streamflow forecast but also in other water-related applications in this region.

*Code and data availability.* Example code for building Random Forest model in R and data are available at <https://github.com/leopham95/RandomForestStreamflowForecast>

*Author contributions.* **Leo Pham:** Conceptualization, Data curation, Formal analysis, Funding acquisition, Investigation, Methodology, Project administration, Software, Validation, Visualization, Writing - original draft. **Lifeng Luo:** Conceptualization, Investigation, Methodology, Funding acquisition, Supervision, Project administration, Resources, Writing - original draft. **Andrew Finley:** Resources, Supervision, Funding acquisition, Writing - original draft.

*Competing interests.* The authors declare that they have no conflict of interest

*Acknowledgements.* Leo Pham was supported by the Algorithms and Software for Supercomputers with emerging architectures Fellowship funded by National Science Foundation Grant No.1827093. We wish to express deep gratitude to the researchers at the National Supercomputing Center in Wuxi, China and Tyler Willson at Michigan State University for the initial brainstorming and project development. Luo's effort was partially supported by the national science foundation (NSF-1615612).

## References

- Adamowski, J. F.: Development of a short-term river flood forecasting method for snowmelt driven floods based on wavelet and cross-wavelet analysis, *Journal of Hydrology*, 353, 247–266, 2008.
- 420 Aubert, D., Loumagne, C., and Oudin, L.: Sequential assimilation of soil moisture and streamflow data in a conceptual rainfall–runoff model, *Journal of Hydrology*, 280, 145–161, 2003.
- Bernard, S., Heutte, L., and Adam, S.: Influence of hyperparameters on random forest accuracy, in: *International Workshop on Multiple Classifier Systems*, pp. 171–180, Springer, 2009.
- Breiman, L.: Random forests, *Machine learning*, 45, 5–32, 2001.
- 425 Calle, M. L. and Urrea, V.: Letter to the editor: stability of random forest importance measures, *Briefings in bioinformatics*, 12, 86–89, 2010.
- Chen, X. and Ishwaran, H.: Random forests for genomic data analysis, *Genomics*, 99, 323–329, 2012.
- Coulston, J. W., Blinn, C. E., Thomas, V. A., and Wynne, R. H.: Approximating prediction uncertainty for random forest regression models, *Photogrammetric Engineering & Remote Sensing*, 82, 189–197, 2016.
- Dawson, C. W., Abrahart, R. J., Shamseldin, A. Y., and Wilby, R. L.: Flood estimation at ungauged sites using artificial neural networks, 430 *Journal of hydrology*, 319, 391–409, 2006.
- Di Luzio, M., Johnson, G. L., Daly, C., Eischeid, J. K., and Arnold, J. G.: Constructing retrospective gridded daily precipitation and temperature datasets for the conterminous United States, *Journal of Applied Meteorology and Climatology*, 47, 475–497, 2008.
- Dibike, Y. B. and Solomatine, D. P.: River flow forecasting using artificial neural networks, *Physics and Chemistry of the Earth, Part B: Hydrology, Oceans and Atmosphere*, 26, 1–7, 2001.
- 435 Dingman, S. L.: *Physical hydrology*, Waveland press, 2015.
- Elsner, M. M., Cuo, L., Voisin, N., Deems, J. S., Hamlet, A. F., Vano, J. A., Mickelson, K. E., Lee, S.-Y., and Lettenmaier, D. P.: Implications of 21st century climate change for the hydrology of Washington State, *Climatic Change*, 102, 225–260, 2010.
- Falcone, J. A.: GAGES-II: Geospatial attributes of gages for evaluating streamflow, Tech. rep., US Geological Survey, 2011.
- Graham, C. B., Barnard, H. R., Kavanagh, K. L., and McNamara, J. P.: Catchment scale controls the temporal connection of transpiration 440 and diel fluctuations in streamflow, *Hydrological Processes*, 27, 2541–2556, 2013.
- Gupta, H. V., Sorooshian, S., and Yapo, P. O.: Status of automatic calibration for hydrologic models: Comparison with multilevel expert calibration, *Journal of Hydrologic Engineering*, 4, 135–143, 1999.
- Gupta, H. V., Kling, H., Yilmaz, K. K., and Martinez, G. F.: Decomposition of the mean squared error and NSE performance criteria: Implications for improving hydrological modelling, *Journal of hydrology*, 377, 80–91, 2009.
- 445 Huang, B. F. and Boutros, P. C.: The parameter sensitivity of random forests, *BMC bioinformatics*, 17, 331, 2016.
- Hwang, S. H., Ham, D. H., and Kim, J. H.: A new measure for assessing the efficiency of hydrological data-driven forecasting models, *Hydrological sciences journal*, 57, 1257–1274, 2012.
- James, G., Witten, D., Hastie, T., and Tibshirani, R.: *An Introduction to Statistical Learning*, volume 103 XIV of, 2013.
- Johnstone, J. A.: A quasi-biennial signal in western US hydroclimate and its global teleconnections, *Climate dynamics*, 36, 663–680, 2011.
- 450 Karran, D. J., Morin, E., and Adamowski, J.: Multi-step streamflow forecasting using data-driven non-linear methods in contrasting climate regimes, *Journal of Hydroinformatics*, 16, 671–689, 2013.
- Knowles, N., Dettinger, M. D., and Cayan, D. R.: Trends in snowfall versus rainfall in the western United States, *Journal of Climate*, 19, 4545–4559, 2006.

- Knowles, N., Dettinger, M., and Cayan, D.: Trends in snowfall versus rainfall for the western united states, 1949-2001. prepared for California  
455 energy commission public interest energy research program, Trends in Snowfall Versus Rainfall for the Western United States, 1949-2001.  
Prepared for California Energy Commission Public Interest Energy Research Program, 2007.
- Kuhn, M. et al.: Building predictive models in R using the caret package, *Journal of statistical software*, 28, 1–26, 2008.
- Legates, D. R. and McCabe Jr, G. J.: Evaluating the use of “goodness-of-fit” measures in hydrologic and hydroclimatic model validation,  
*Water resources research*, 35, 233–241, 1999.
- 460 Li, D., Wrzesien, M. L., Durand, M., Adam, J., and Lettenmaier, D. P.: How much runoff originates as snow in the western United States,  
and how will that change in the future?, *Geophysical Research Letters*, 44, 6163–6172, 2017.
- Li, X., Sha, J., and Wang, Z.-L.: Comparison of daily streamflow forecasts using extreme learning machines and the random forest method,  
*Hydrological Sciences Journal*, 64, 1857–1866, 2019.
- Liaw, A., Wiener, M., et al.: Classification and regression by randomForest, *R news*, 2, 18–22, 2002.
- 465 Louppe, G., Wehenkel, L., Suter, A., and Geurts, P.: Understanding variable importances in forests of randomized trees, in: *Advances in  
neural information processing systems*, pp. 431–439, 2013.
- Lundquist, J. D., Dettinger, M. D., Stewart, I. T., and Cayan, D. R.: Variability and trends in spring runoff in the western United States,  
*Climate warming in western North America: evidence and environmental effects*. University of Utah Press, Salt Lake City, Utah, USA,  
pp. 63–76, 2009.
- 470 Mantua, N., Tohver, I., and Hamlet, A.: Impacts of climate change on key aspects of freshwater salmon habitat in Washington State, 2009.
- Mass, C.: *The weather of the Pacific Northwest*, University of Washington Press, 2015.
- Mentch, L. and Hooker, G.: Quantifying uncertainty in random forests via confidence intervals and hypothesis tests, *The Journal of Machine  
Learning Research*, 17, 841–881, 2016.
- Mittermaier, M. P.: The potential impact of using persistence as a reference forecast on perceived forecast skill, *Weather and forecasting*, 23,  
475 1022–1031, 2008.
- Mosavi, A., Ozturk, P., and Chau, K.-w.: Flood prediction using machine learning models: Literature review, *Water*, 10, 1536, 2018.
- Mote, P. W., Li, S., Lettenmaier, D. P., Xiao, M., and Engel, R.: Dramatic declines in snowpack in the western US, *Npj Climate and  
Atmospheric Science*, 1, 1–6, 2018.
- Nicodemus, K. K.: Letter to the editor: On the stability and ranking of predictors from random forest variable importance measures, *Briefings  
480 in bioinformatics*, 12, 369–373, 2011.
- Obringer, R. and Nateghi, R.: Predicting urban reservoir levels using statistical learning techniques, *Scientific reports*, 8, 5164, 2018.
- Oshiro, T. M., Perez, P. S., and Baranauskas, J. A.: How many trees in a random forest?, in: *International workshop on machine learning and  
data mining in pattern recognition*, pp. 154–168, Springer, 2012.
- Pal, M.: Random forest classifier for remote sensing classification, *International Journal of Remote Sensing*, 26, 217–222, 2005.
- 485 Pan, M., Sheffield, J., Wood, E. F., Mitchell, K. E., Houser, P. R., Schaake, J. C., Robock, A., Lohmann, D., Cosgrove, B., Duan, Q., et al.:  
Snow process modeling in the North American Land Data Assimilation System (NLDAS): 2. Evaluation of model simulated snow water  
equivalent, *Journal of Geophysical Research: Atmospheres*, 108, 2003.
- Papacharalampous, G. A. and Tyrallis, H.: Evaluation of random forests and Prophet for daily streamflow forecasting, *Advances in Geo-  
sciences*, 45, 201–208, 2018.
- 490 Payne, J. T., Wood, A. W., Hamlet, A. F., Palmer, R. N., and Lettenmaier, D. P.: Mitigating the effects of climate change on the water  
resources of the Columbia River basin, *Climatic change*, 62, 233–256, 2004.

Probst, P., Wright, M. N., and Boulesteix, A.-L.: Hyperparameters and tuning strategies for random forest, *Wiley Interdisciplinary Reviews: Data Mining and Knowledge Discovery*, 9, e1301, 2019.

Ralph, F., Dettinger, M., White, A., Reynolds, D., Cayan, D., Schneider, T., Cifelli, R., Redmond, K., Anderson, M., Gherke, F., et al.: A  
495 vision for future observations for western US extreme precipitation and flooding, *Journal of Contemporary Water Research & Education*, 153, 16–32, 2014.

Rasouli, K., Hsieh, W. W., and Cannon, A. J.: Daily streamflow forecasting by machine learning methods with weather and climate inputs, *Journal of Hydrology*, 414, 284–293, 2012.

Regonda, S. K., Rajagopalan, B., Clark, M., and Pitlick, J.: Seasonal cycle shifts in hydroclimatology over the western United States, *Journal*  
500 *of climate*, 18, 372–384, 2005.

Rogelis, M. C., Werner, M., Obregón, N., and Wright, N.: Hydrological model assessment for flood early warning in a tropical high mountain basin, *Hydrology and Earth System Sciences Discussions*, 2016.

Schönfelder, L. H., Bakken, T. H., Alfredsen, K., and Adera, A. G.: Application of HYPE in Norway, SINTEF Energi. Rapport, 2017.

Seibold, H., Bernau, C., Boulesteix, A.-L., and De Bin, R.: On the choice and influence of the number of boosting steps for high-dimensional  
505 linear Cox-models, *Computational Statistics*, 33, 1195–1215, 2018.

Shortridge, J. E., Guikema, S. D., and Zaitchik, B. F.: Machine learning methods for empirical streamflow simulation: a comparison of model accuracy, interpretability, and uncertainty in seasonal watersheds, *Hydrology and Earth System Sciences*, 20, 2611–2628, 2016.

Siqueira, V. A., Paiva, R. C. D. d., Fleischmann, A. S., Fan, F. M., Ruhoff, A. L., Pontes, P. R. M., Paris, A., Calmant, S., and Collischonn, W.:  
Toward continental hydrologic–hydrodynamic modeling in South America, *Hydrology and Earth System Sciences*. Göttingen: Copernicus.  
510 Vol. 22, n. 9 (set. 2018), p. 4815–4842, 2018.

Srivastava, A., Wu, J. Q., Elliot, W. J., Brooks, E. S., and Flanagan, D. C.: Modeling streamflow in a snow-dominated forest watershed using the Water Erosion Prediction Project (WEPP) model, *Transactions of the ASABE*. 60 (4): 1171–1187., 60, 1171–1187, 2017.

Strobl, C., Boulesteix, A.-L., Zeileis, A., and Hothorn, T.: Bias in random forest variable importance measures: Illustrations, sources and a solution, *BMC bioinformatics*, 8, 25, 2007.

Tongal, H. and Booij, M. J.: Simulation and forecasting of streamflows using machine learning models coupled with base flow separation,  
515 *Journal of hydrology*, 564, 266–282, 2018.

Tyralis, H., Papacharalampous, G., and Langousis, A.: A brief review of random forests for water scientists and practitioners and their recent history in water resources, *Water*, 11, 910, 2019.

U.S. Geological Survey: U.S. Geological Survey, 2019, National Hydrography Dataset (ver. USGS National Hydrography Dataset  
520 Best Resolution (NHD) for Hydrologic Unit (HU) 4 - 2001), <https://www.usgs.gov/core-science-systems/ngp/national-hydrography/access-national-hydrography-products>, 2020.

Vano, J. A., Nijssen, B., and Lettenmaier, D. P.: Seasonal hydrologic responses to climate change in the Pacific Northwest, *Water Resources Research*, 51, 1959–1976, 2015.

Wager, S., Hastie, T., and Efron, B.: Confidence intervals for random forests: The jackknife and the infinitesimal jackknife, *The Journal of*  
525 *Machine Learning Research*, 15, 1625–1651, 2014.

Wang, Z., Lai, C., Chen, X., Yang, B., Zhao, S., and Bai, X.: Flood hazard risk assessment model based on random forest, *Journal of Hydrology*, 527, 1130–1141, 2015.

Wenger, S. J., Luce, C. H., Hamlet, A. F., Isaak, D. J., and Neville, H. M.: Macroscale hydrologic modeling of ecologically relevant flow metrics, *Water Resources Research*, 46, 2010.



530 Zheng, X., Wang, Q., Zhou, L., Sun, Q., and Li, Q.: Predictive Contributions of Snowmelt and Rainfall to Streamflow Variations in the Western United States, *Advances in Meteorology*, 2018, 2018.

**Figure 1.** Structure of a RF and relevant parameters

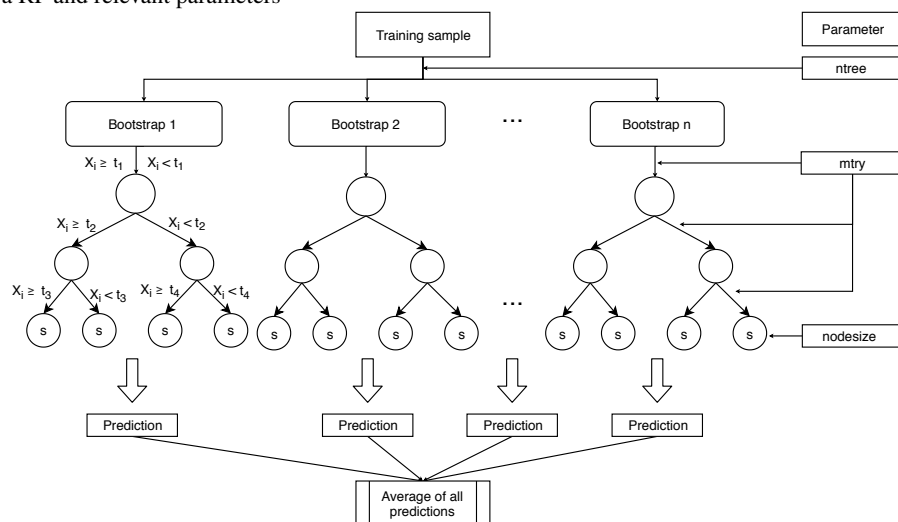

**Figure 2.** (a) Elevation (m) shading map showing the Pacific Northwest Hydrological Unit, 86 selected stream gauges (triangles), and their drainage area (cyan delineation lines), and SNOTEL stations (brown squares). Examples of annual hydrographs of (a) rainfall-dominated, (b) transient regime, and (c) snowmelt-dominated watersheds. Figures (a-c) are based on 2009-2018 daily flow data at three sites 12043300 (124.4W, 48.2N), 12048000 (123.1W, 48N), and 10396000 (118.9W, 42.7N), respectively.

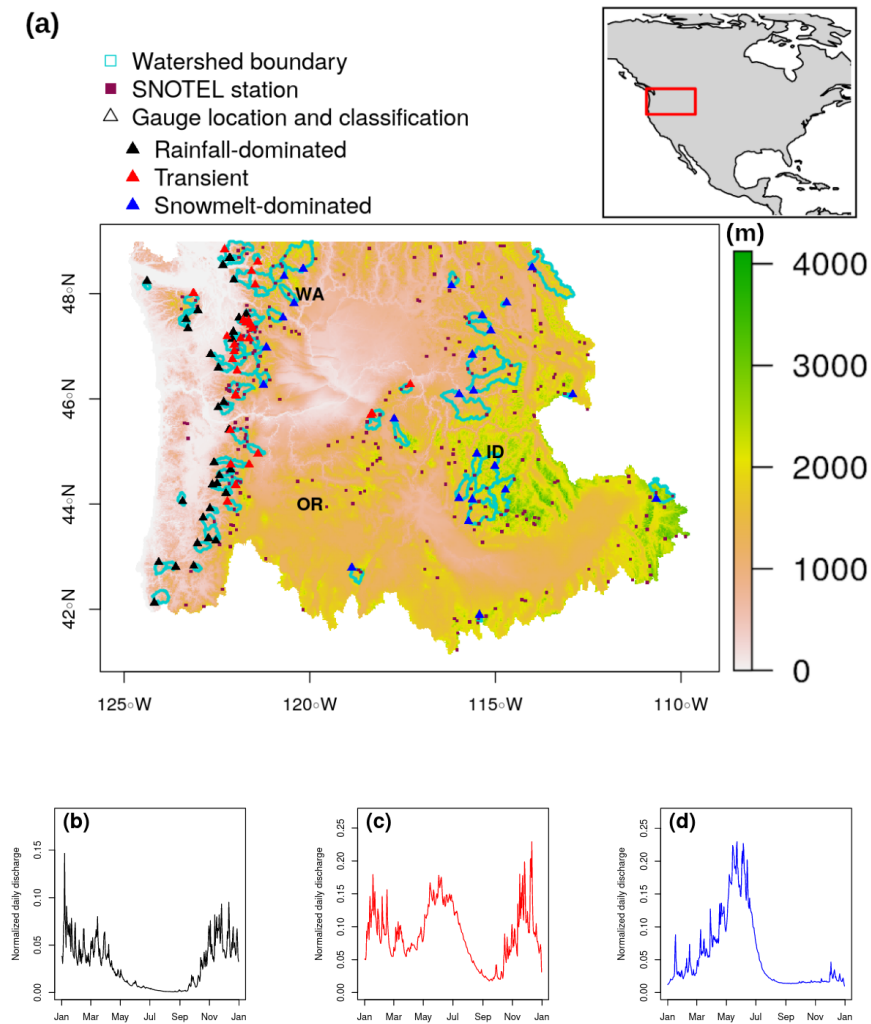

**Figure 3.** Flowchart showing the input-output model based on Random Forest

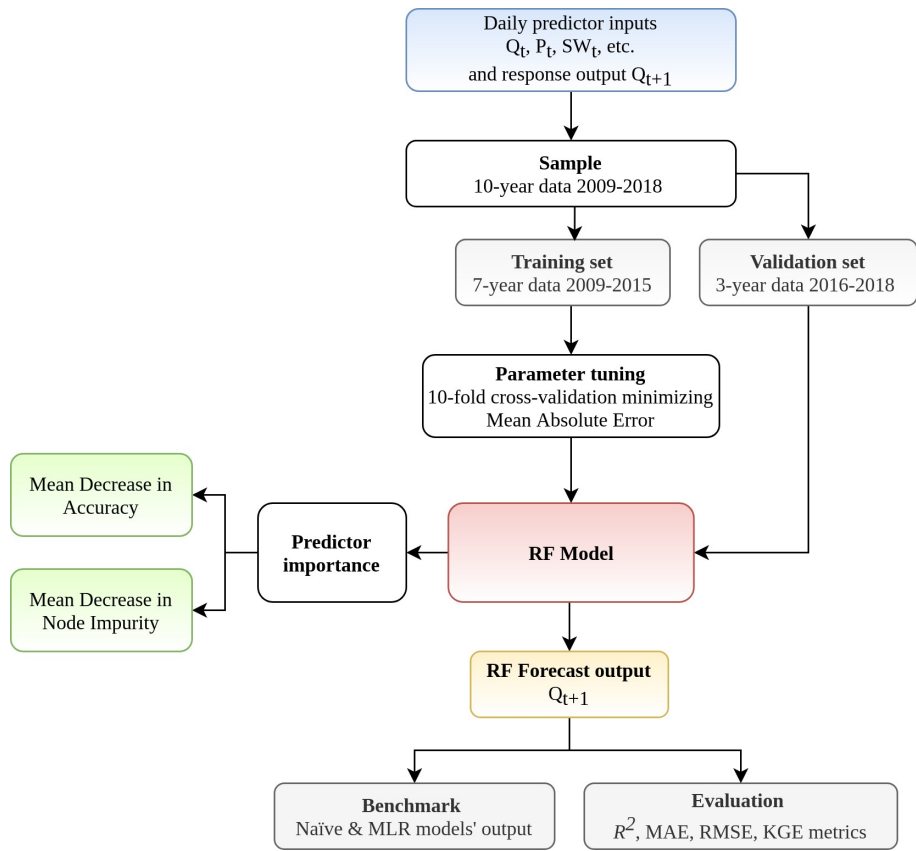

**Figure 4.** Out-of-bag Mean Absolute Error plotted against `mtry` during optimal parameter search at site USGS 12094000.

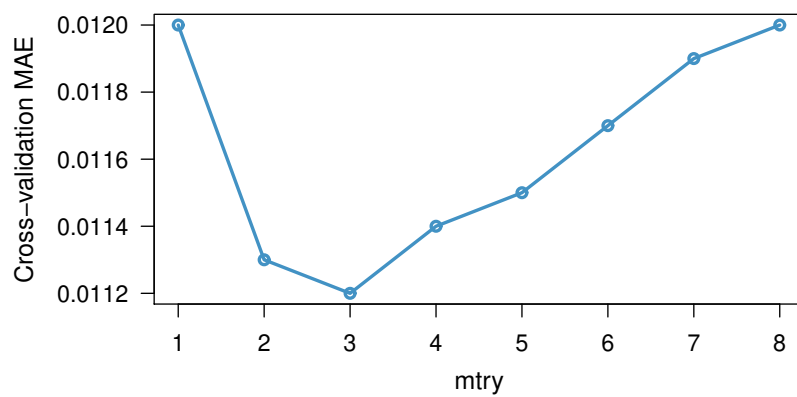



**Figure 5.** Pairwise scatter plots of Pearson correlation coefficient between forecasted and observed values for (a) Random Forest vs. Naïve Model, (b) Random Forest vs Multiple Linear Regression, and (c) Multiple Linear Regression vs. Naïve Model. Each dot represents one watershed (n=86).

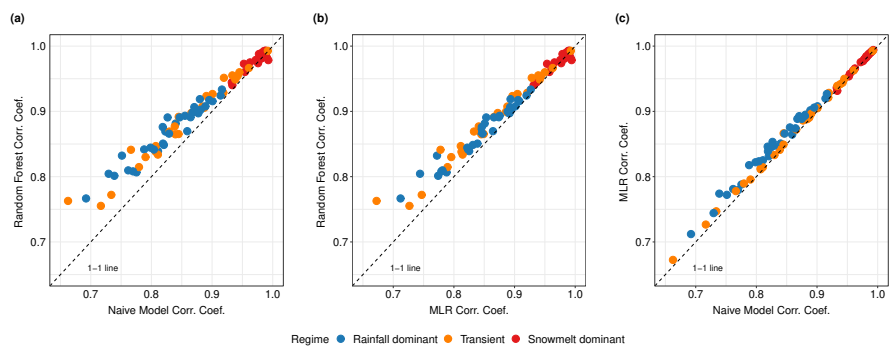

**Figure 6.** Streamflow daily forecast scores computed over the validation period (2016-2018) for RF model across four metrics (a)  $R^2$  and KGE (b) MAE and RMSE.

(a)

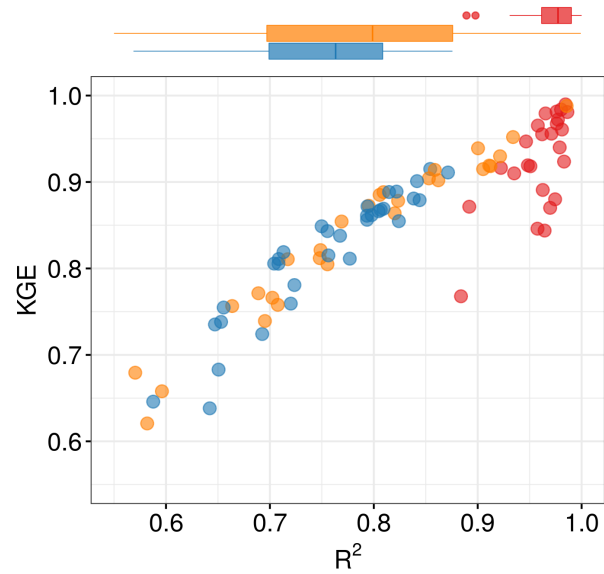

(b)

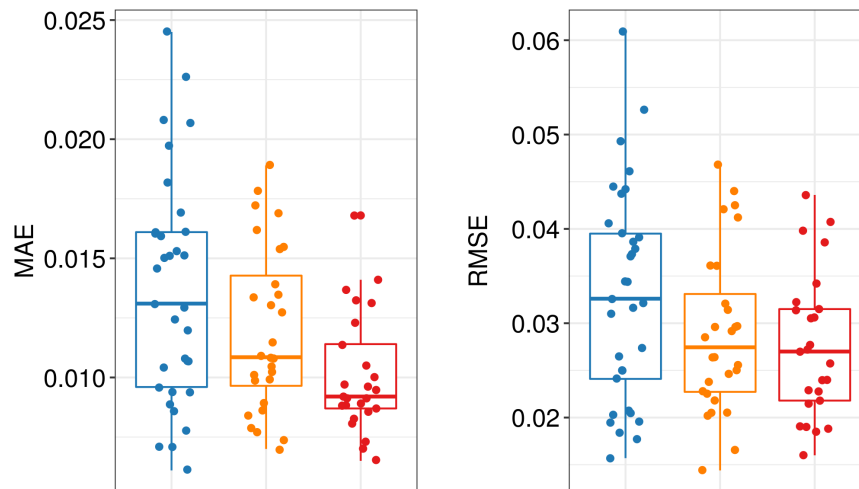

Regime ■ Rainfall dominant ■ Transient ■ Snowmelt dominant

**Figure 7.** (a) Number of times RF *correctly* forecasted events that exceeded 90<sup>th</sup>, 95<sup>th</sup>, and 99<sup>th</sup> thresholds divided by the total number of exceedance. (b) Number of times RF *incorrectly* forecasted events that exceeded 90<sup>th</sup>, 95<sup>th</sup>, and 99<sup>th</sup> thresholds divided by the total number of non-exceedance.

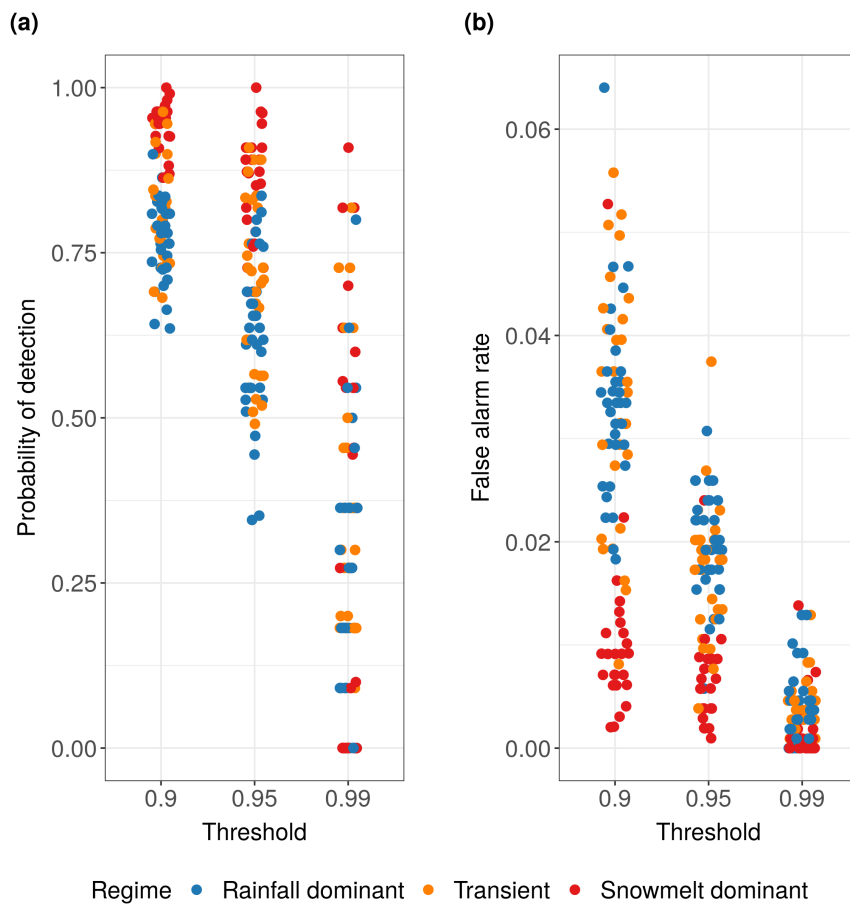

**Figure 8.** Barplots show importance of predictor variables using (a-c) DMA and (d-f) DMI metrics. Length of the blue bars indicates the median value across the watersheds for each flow regime and the thin black bar represents the range of the values.

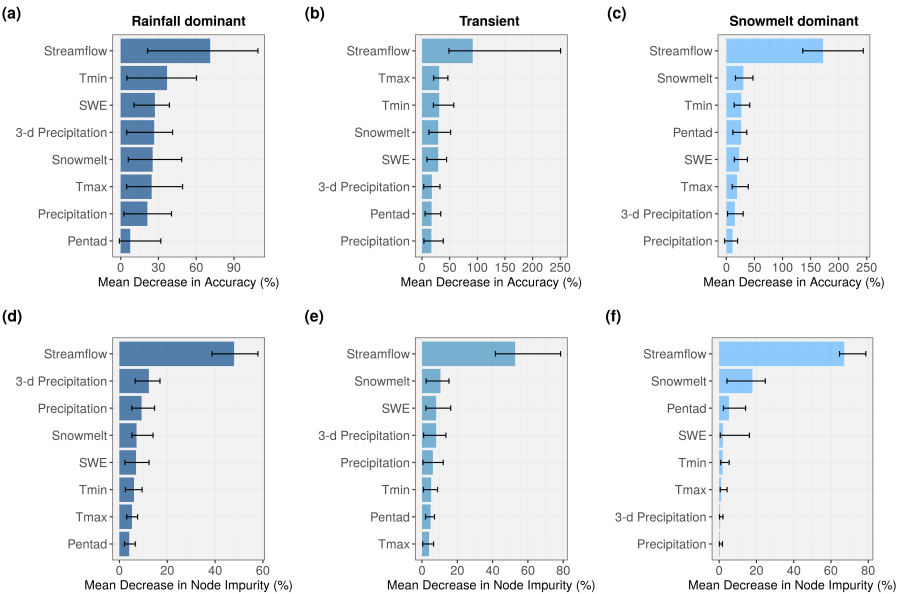

**Figure 9.** KGE scores plotted against average percentage of sand in soil at each watershed. Best-fit lines were determined using simple linear regression.

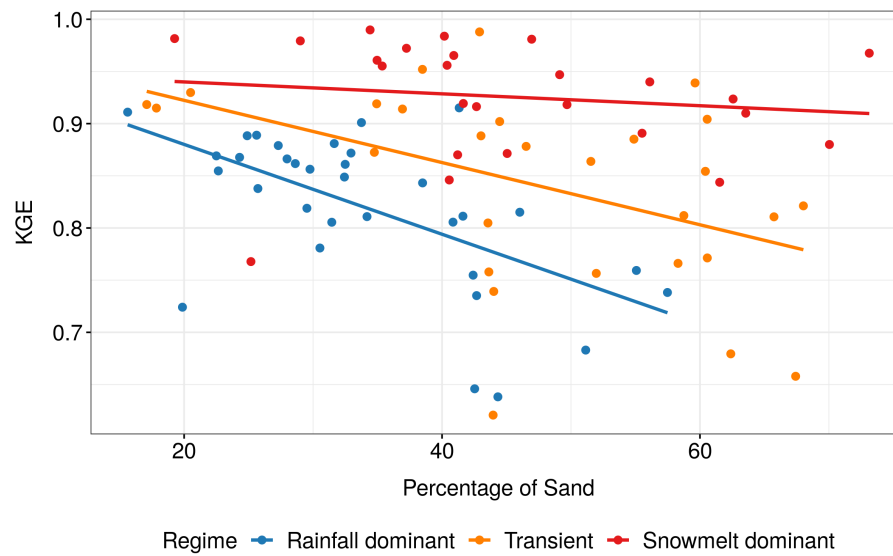

**Table 1.** Number of streamflow gauges used in the study for each flow regime, ranges of mean watershed elevation and drainage area. Complete catchment physical and hydro-climatic characteristics at individual site (retrieved from Falcone (2011)).

| Hydrologic regime  | Number of gauges | Mean watershed elevation (m) | Drainage area (km <sup>2</sup> ) |
|--------------------|------------------|------------------------------|----------------------------------|
| Rainfall-dominated | 33               | 239 - 1207                   | 58 - 703                         |
| Transitional       | 28               | 813 - 1477                   | 58 - 1855                        |
| Snowmelt-dominated | 25               | 1349 - 2509                  | 51 - 3355                        |

**Table 2.** List of potential predictors.

| No. | Predictors                                               | Index    | Unit               | Source              |
|-----|----------------------------------------------------------|----------|--------------------|---------------------|
| 1   | Streamflow at day $t$                                    | $Q_t$    | ft <sup>3</sup> /s | USGS                |
| 2   | Precipitation                                            | $P_t$    | mm                 | PRISM               |
| 3   | Sum of 3-day precipitation ( $P_t + P_{t-1} + P_{t-2}$ ) | $P3_t$   | mm                 | Derived from PRISM  |
| 4   | Snow water equivalent                                    | $SWE_t$  | in                 | SNOTEL              |
| 5   | Maximum temperature                                      | $TMAX_t$ | degree F           | SNOTEL              |
| 6   | Minimum temperature                                      | $TMIN_t$ | degree F           | SNOTEL              |
| 7   | Snowmelt ( $SW_t - SW_{t-1}$ )                           | $SD_t$   | in                 | Derived from SNOTEL |
| 8   | Pentad index                                             | $PEN_t$  | -                  | -                   |



**Table 3.** The achieved parameter `mtry` using exhaustive-search strategy (`mtry` = {1,2,6,7,8} were considered but not found as the optimal value at any gauge).

| <code>mtry</code> | Number of gauges | Median MAE |
|-------------------|------------------|------------|
| 3                 | 29               | 0.0127     |
| 4                 | 44               | 0.0116     |
| 5                 | 13               | 0.0079     |

**Table 4.** Descriptive statistics of the four metrics used to evaluate the overall performance of Random Forest:  $R^2$ , KGE, MAE, and RMSE.

| Metric | Flow regime       | Min    | Q1     | Median | Q3     | Max    |
|--------|-------------------|--------|--------|--------|--------|--------|
| $R^2$  | Rainfall dominant | 0.59   | 0.71   | 0.77   | 0.81   | 0.87   |
|        | Transient         | 0.57   | 0.71   | 0.80   | 0.87   | 0.99   |
|        | Snowmelt dominant | 0.88   | 0.95   | 0.97   | 0.98   | 0.99   |
| KGE    | Rainfall dominant | 0.64   | 0.78   | 0.84   | 0.87   | 0.92   |
|        | Transient         | 0.62   | 0.77   | 0.86   | 0.91   | 0.99   |
|        | Snowmelt dominant | 0.77   | 0.89   | 0.94   | 0.97   | 0.99   |
| MAE    | Rainfall dominant | 0.0061 | 0.0096 | 0.0131 | 0.0161 | 0.0245 |
|        | Transient         | 0.0070 | 0.0097 | 0.0109 | 0.0143 | 0.0189 |
|        | Snowmelt dominant | 0.0065 | 0.0087 | 0.0092 | 0.0114 | 0.0168 |
| RMSE   | Rainfall dominant | 0.0157 | 0.0241 | 0.0326 | 0.0395 | 0.0609 |
|        | Transient         | 0.0144 | 0.0227 | 0.0275 | 0.0331 | 0.0468 |
|        | Snowmelt dominant | 0.0160 | 0.0218 | 0.0270 | 0.0315 | 0.0436 |

**Table 5.** Pearson correlation coefficient between KGE scores and selected basin variables. Highlighted red values indicate the relationship is significant at 5 percent or 1 percent level.

| Watershed characteristics | Hydrologic regime |           |                   |
|---------------------------|-------------------|-----------|-------------------|
|                           | Rainfall dominant | Transient | Snowmelt dominant |
| Slope                     | -0.42             | -0.68     | 0.12              |
| Aspect eastness           | -0.02             | 0.12      | -0.12             |
| Drainage area             | 0.14              | -0.12     | 0.11              |
| Basin compactness         | 0.09              | -0.12     | -0.16             |
| Stream density            | -0.10             | 0.29      | -0.27             |
| Percent of sand           | -0.59             | -0.46     | -0.14             |
| Percent of forested area  | -0.11             | 0.32      | 0.32              |
